# Supplementary material for: Facile synthesis of three-dimensional Pt–Pd alloyed multipods with enhanced electrocatalytic activity and stability for ethylene glycol oxidation
Source: Royal Society of Chemistry journal article supplement (doi:10.1039/c5nr00174a), 2015-01-01
Supplement: c5nr00174a1.pdf [file c5nr00174a1.pdf]

Electronic Supplementary Information

**Facile synthesis of three-dimensional Pt-Pd alloyed  
multipods with enhanced electrocatalytic activity and  
stability for ethylene glycol oxidation**

Jing-Jing Lv, Li-Ping Mei, Xuexiang Weng, Ai-Jun Wang\*, Li-Li Chen, Xiang-Feng Liu, Jiu-Ju  
Feng\*

*College of Geography and Environmental Science, College of Chemistry and Life Science,  
Zhejiang Normal University, Jinhua 321004, China*

*\*Corresponding Author: Tel./Fax: +86 579 82282269. Email: [ajwang@zjnu.cn](mailto:ajwang@zjnu.cn) (AJW);  
[jjfeng@zjnu.cn](mailto:jjfeng@zjnu.cn) (JJF).*

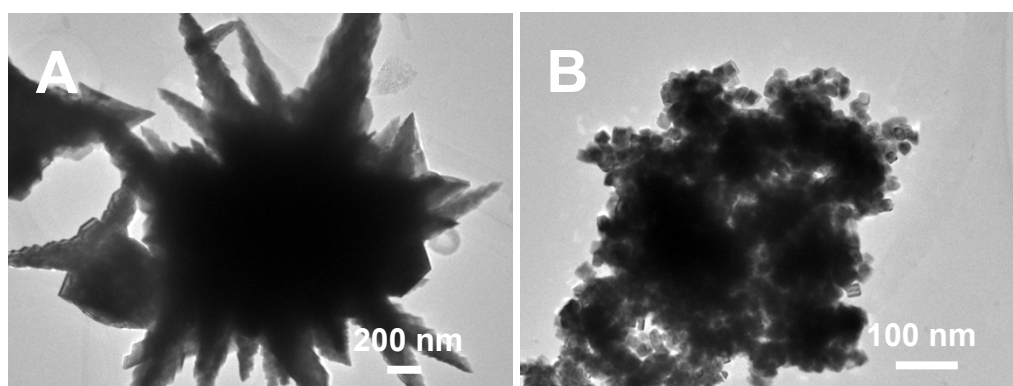

**Figure S1** TEM images of the products collected in the absence of EG (A) and using DMF instead of EG (B).

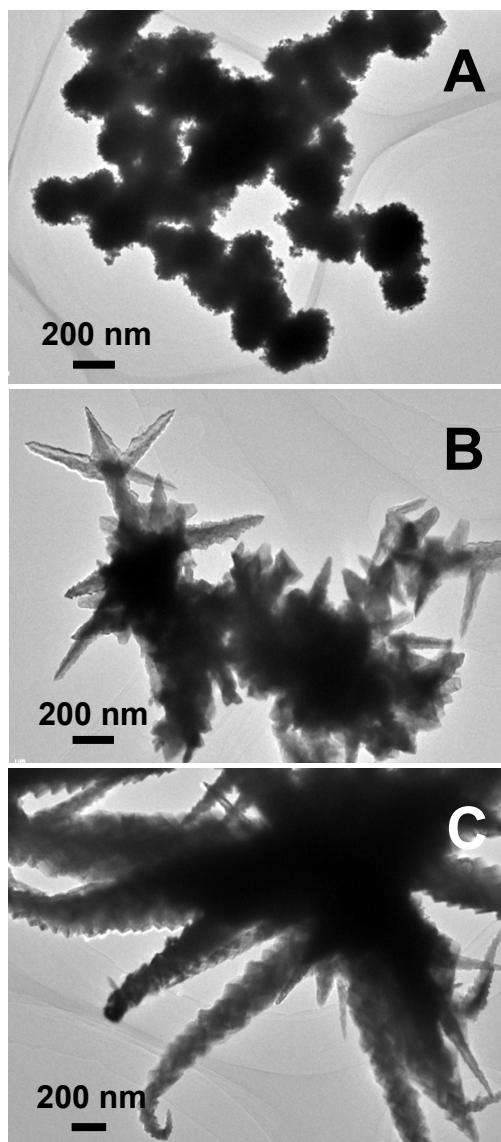

**Figure S2** TEM images of the products collected without (A), and with 1.32 M (B) and 4.37 M (C) *N*-methylimidazole.

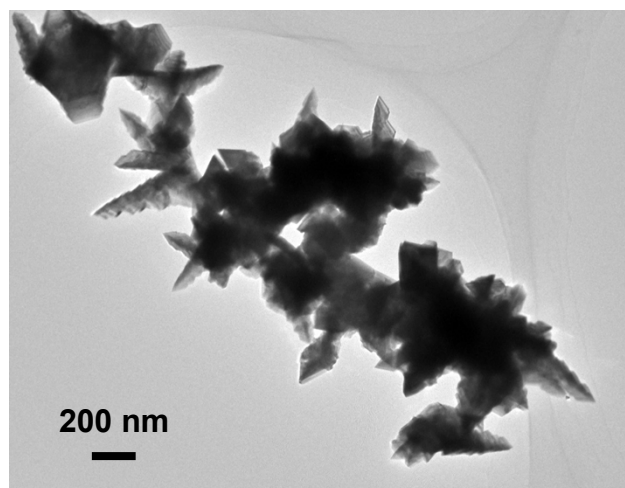

**Figure S3** TEM image of the product collected by only using PdCl<sub>2</sub> as the precursor.

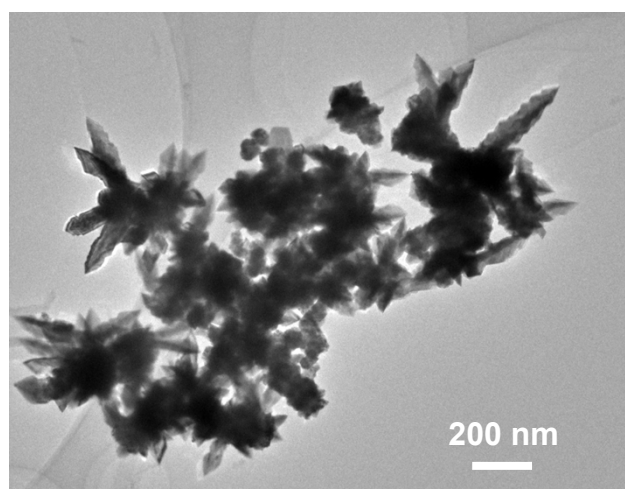

**Figure S4** TEM image of the product collected by using  $\text{Pt}(\text{acac})_2$  and  $\text{Pd}(\text{acac})_2$  as the precursors.

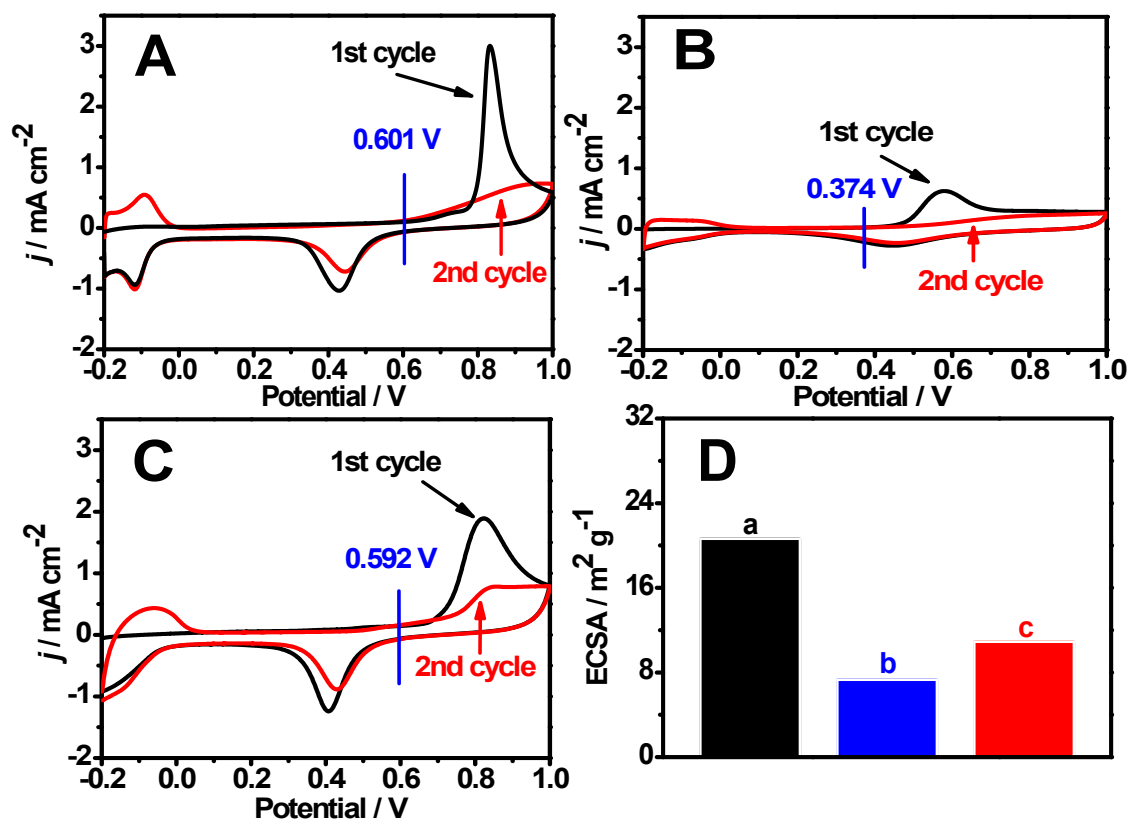

**Figure S5** CO-stripping voltammograms of the Pt-Pd multipods (A), Pt black (B), and Pd black (C) catalyst-modified electrodes in 0.5 M  $\text{H}_2\text{SO}_4$  at a scan rate of  $50 \text{ mV s}^{-1}$ . The ECSA (D) of Pt-Pd multipods (a), Pt black (b), and Pd black (c).

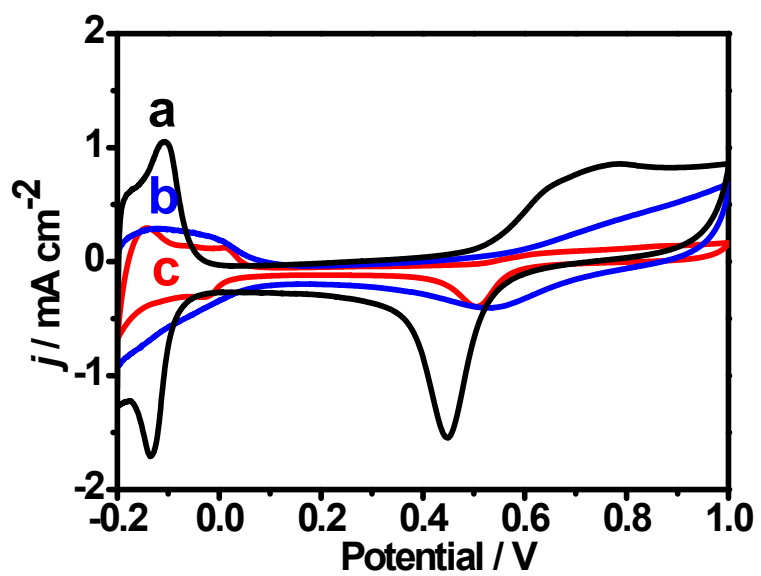

**Figure S6** CVs of the Pt-Pd multipods (curve a), Pt black (curve b), and Pd black (curve c) catalyst-modified electrodes in 0.5 M  $\text{H}_2\text{SO}_4$  at a scan rate of  $50 \text{ mV s}^{-1}$ .

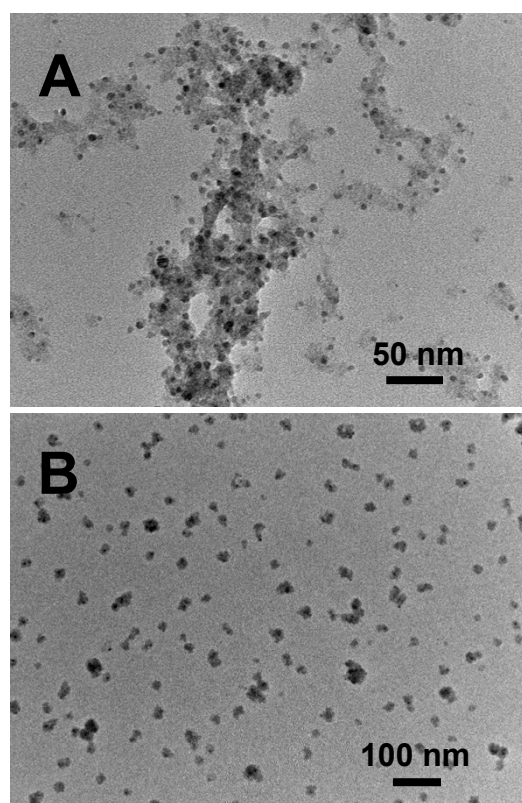

**Figure S7** TEM images of Pt black and Pd black.
